# Supplementary material for: The Impact of Geological Structures on Groundwater Potential Assessment in Volcanic Rocks of the Northwestern Ethiopian Plateau: A Review
Source: Copernicus journal article supplement (doi:10.5194/egusphere-2024-4201), 2025-01-28
Supplement: Supplementary file [file egusphere-2024-4201-AC1-supplement.pdf]

Dear Reviewer,

Thank you for your valuable feedbacks, those feedbacks and suggestions are very important to strengthen my paper quality.

I correct all comments one by one on the revised manuscript based the journal standard.

|                                                                     |                                                                                                                                                                                 |
|---------------------------------------------------------------------|---------------------------------------------------------------------------------------------------------------------------------------------------------------------------------|
| Abstract and Introduction                                           | Thank you, your comments and suggestion, I try to correct by rewrite and elaborate more.                                                                                        |
| Methods for Assessing Structural Influence on Groundwater Potential | Yes, the methodology is somewhat complex and inconsistent incase of reviewing papers on this section                                                                            |
| Role of Geological Structures in Groundwater Potential              | I put the detail structural features with evidences of field photographs and digitizing in map on the revised manuscript                                                        |
| Case Studies                                                        | I accept your suggestions and comments, so I address specific case studies based the objectives my reviews.                                                                     |
| Challenges and Opportunities                                        | I correct on the revised manuscript paper, and put specific methods and ways of opportunities to the review                                                                     |
| Conclusion and Recommendations                                      | Yes, try to rewrite again the concept based on the objectives of the research review guideline and your suggestions.                                                            |
| Technical Corrections                                               | I correct it on revised part like "This review examines how geological structures influence groundwater potential in the volcanic rocks of the Northwestern Ethiopian Plateau." |

With kind regards,

Bishaw Mihret

\*corresponding author.
