# Supplementary material for: The Impact of Geological Structures on Groundwater Potential Assessment in Volcanic Rocks of the Northwestern Ethiopian Plateau: A Review
Source: Copernicus journal article supplement (doi:10.5194/egusphere-2024-4201), 2025-01-28
Supplement: Supplementary file [file egusphere-2024-4201-AC2-supplement.pdf]

Dear Reviewer,

Thank you for your valuable feedbacks, those feedbacks and suggestions are very important to strengthen my paper quality.

I correct all comments one by one on the revised manuscript based the journal standard.

|                    |                                                                                                                                                         |
|--------------------|---------------------------------------------------------------------------------------------------------------------------------------------------------|
| General Comments   | I try to correct into consistent and surprising findings based on the review paper and journal standards. This strength my paper quality.               |
| Specific Comments: | I accept your comments, I try to correct them especially referencing and the idea correlation, sentences bias. I can correct on the revised manuscript. |

I hope this finds you well. I look forward your positive response.

With kind regards

Bishaw Mihret

\*corresponding author.
