# Supplementary material for: The Impact of Geological Structures on Groundwater Potential Assessment in Volcanic Rocks of the Northwestern Ethiopian Plateau: A Review
Source: Copernicus journal article supplement (doi:10.5194/egusphere-2024-4201), 2025-01-28
Supplement: Supplementary file [file egusphere-2024-4201-CC1-supplement.pdf]

**Title - Impact of Geological Structures on Groundwater Potential Assessment in Volcanic Rocks of the North western Ethiopian Plateau: A Review**

**Manuscript Number-** egosphere-2024-4201

**Comments to the Author**

The manuscript presents the review geological Structure and the petrographic volcano rocks in the Northwestern Ethiopian Plateau to understanding the impact on ground water potential assessment. This view of reviewing is important for scientific implication to hydrology and hydrogeological discipline to know about more the groundwater system in volcanic geology. Geological structures are crucial for groundwater flow system in act as permeability (interconnected pores spaces). The present topic of the manuscript is within the aims and scopes of the journal. However, the manuscript addresses the following comments before acceptance of publication like: -

1. the paper deals about the regional discussion and broad way, no clear study area boundary, so please prepare the location map and with clear geographic coordinates, some sentences are grammatically incorrect.

Therefore, I recommended the manuscript for minor revision before publication in Journal of Hydrology and Earth System Sciences (HESS).
